# Supplementary material for: Time-Dependent Decay of mRNA and Ribosomal RNA during Platelet Aging and Its Correlation with Translation Activity
Source: PubMed Central journal article supplement (PMC4726520; doi:10.1371/journal.pone.0148064), 2016-01-25

S1 Fig. Increased MK density after recovery.

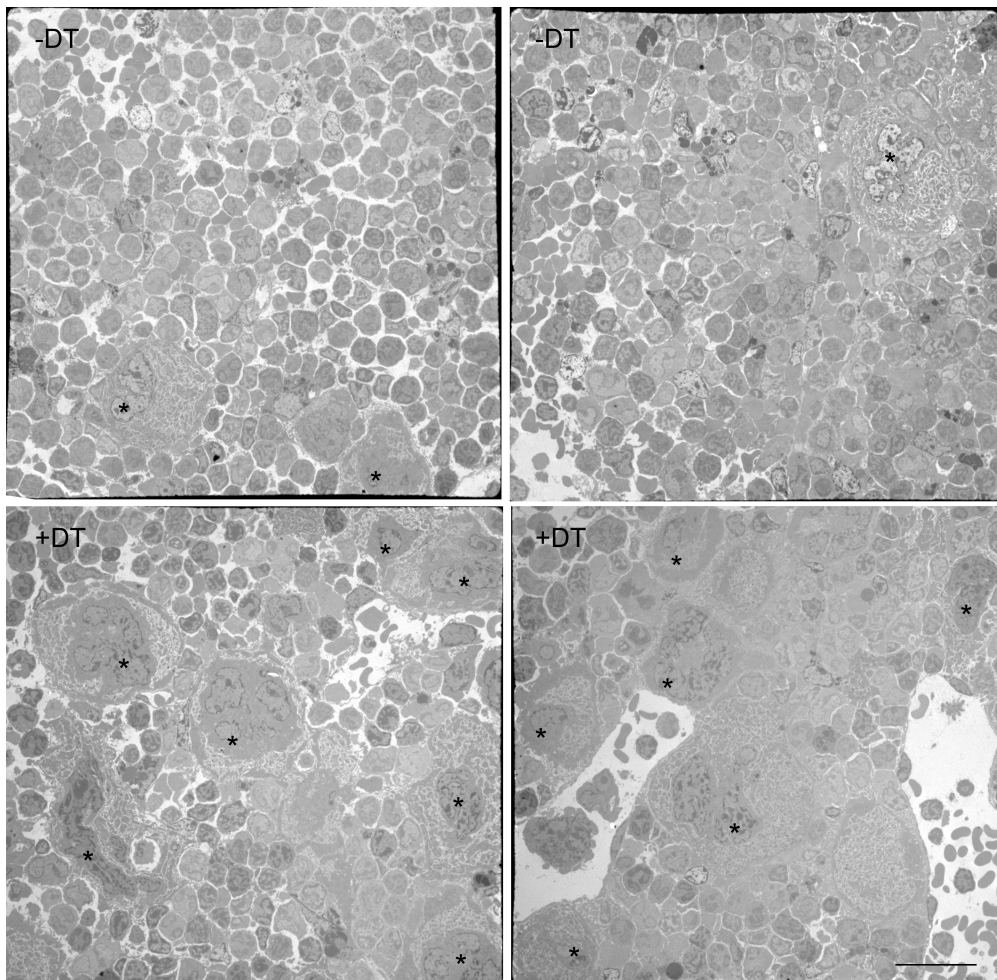

Supplement: pone.0148064.s001.pdf [file pone.0148064.s001.pdf]
