# Supplementary material for: Time-Dependent Decay of mRNA and Ribosomal RNA during Platelet Aging and Its Correlation with Translation Activity
Source: PubMed Central journal article supplement (PMC4726520; doi:10.1371/journal.pone.0148064), 2016-01-25

S6 Fig. Quality of RNA extracted from in vitro-differentiated MKs and control or retPLTs.

A

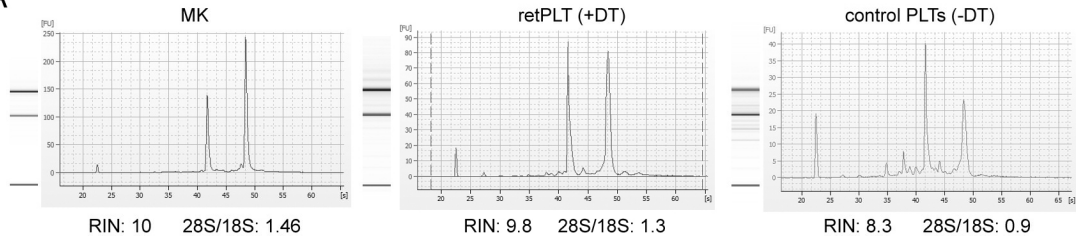

B

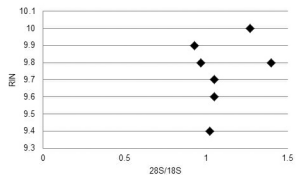

C

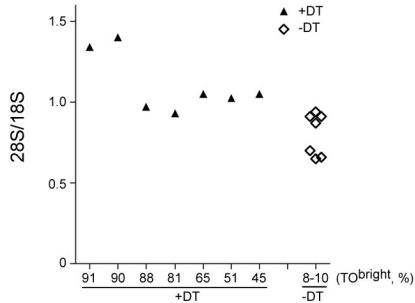

D

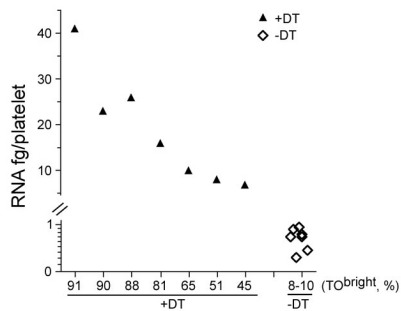

Supplement: pone.0148064.s006.pdf [file pone.0148064.s006.pdf]
